# Supplementary material for: Low-temperature selective catalytic reduction of NOx with NH3 over an activated carbon-carbon nanotube composite material prepared by in situ method
Source: Royal Society of Chemistry journal article supplement (doi:10.1039/c9ra08640d), 2019-01-01
Supplement: c9ra08640d1.pdf [file c9ra08640d1.pdf]

## Supporting information

### Low-temperature selective catalytic reduction of NO<sub>x</sub> with NH<sub>3</sub> over activated carbon-carbon nanotubes composite material prepared by *in-situ* method

Pengchen Wang,<sup>a</sup> Lu Yao,<sup>a,b\*</sup> Yijuan Pu,<sup>a</sup> Lin Yang,<sup>a,b</sup> Xia Jiang,<sup>a,b</sup> Wenju Jiang<sup>a,b,\*</sup>

<sup>a</sup> College of Architecture and Environment, Sichuan University, Chengdu 610065, P.R. China

<sup>b</sup> National Engineering Research Center for Flue Gas Desulfurization, Chengdu 610065, P.R. China

\*Corresponding author. E-mail: yaolu@scu.edu.cn (L. Yao); wenjujiang@scu.edu.cn (W. Jiang);

Tel: +86-28-8540 7800; Fax: +86-28- 8540 5613

## Figures

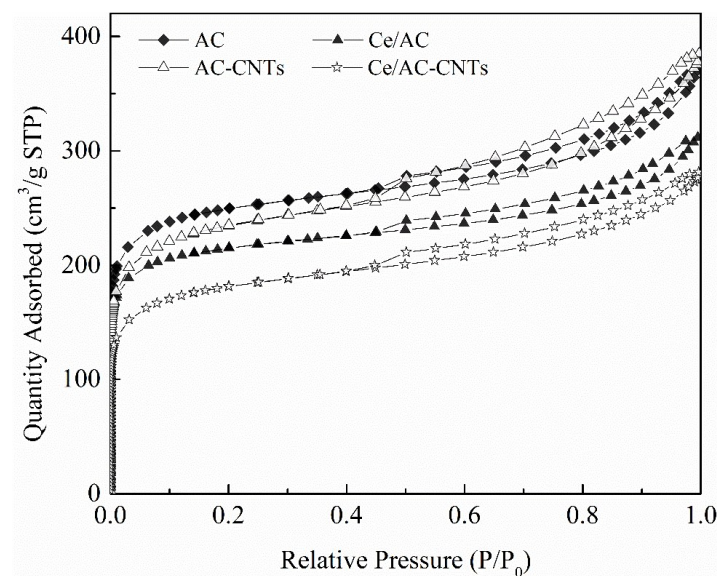

Fig. S1. N<sub>2</sub> adsorption-desorption isotherms of prepared samples.

The XRD patterns of AC, AC-CNTs Ce/AC and Ce/AC-CNTs were exhibited in Fig. S2. The wide diffraction peaks locating at 20-30 ° of graphite (002) were reflected the existence of graphite crystallite with layered structure (JCPDS 26-1079). The typical peaks of Ce/AC and Ce/AC-CNTs at

$2\theta = 28.6^\circ, 47.5^\circ$  and  $56.3^\circ$  corresponded to  $\text{CeO}_2$  (JCPDS 34-0394) <sup>1</sup>.

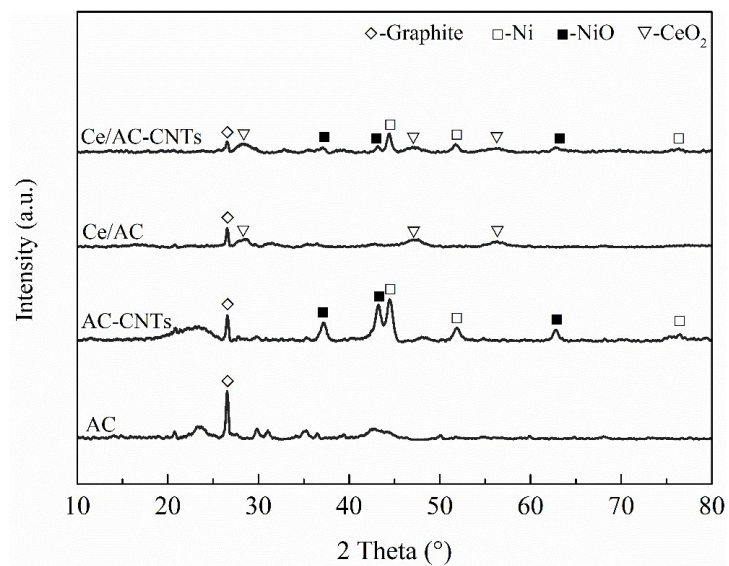

Fig. S2. XRD patterns AC, AC-CNTs, Ce/AC and Ce/AC-CNTs.

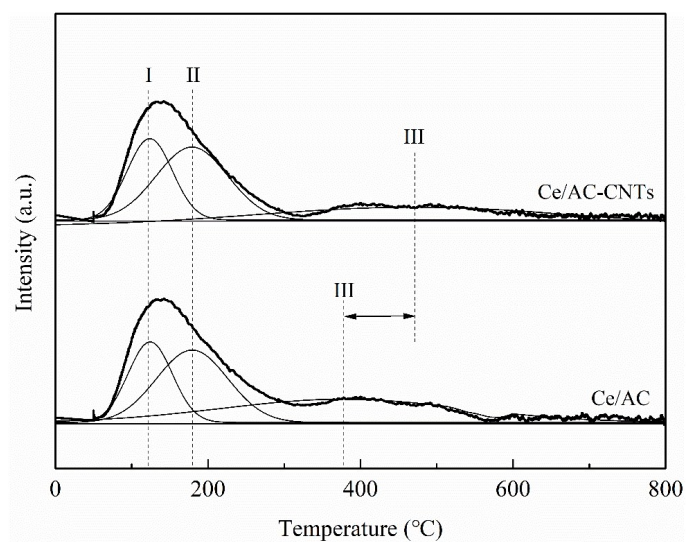

Fig. S3.  $\text{NH}_3$ -TPD profiles of Ce/AC and Ce/AC-CNTs.

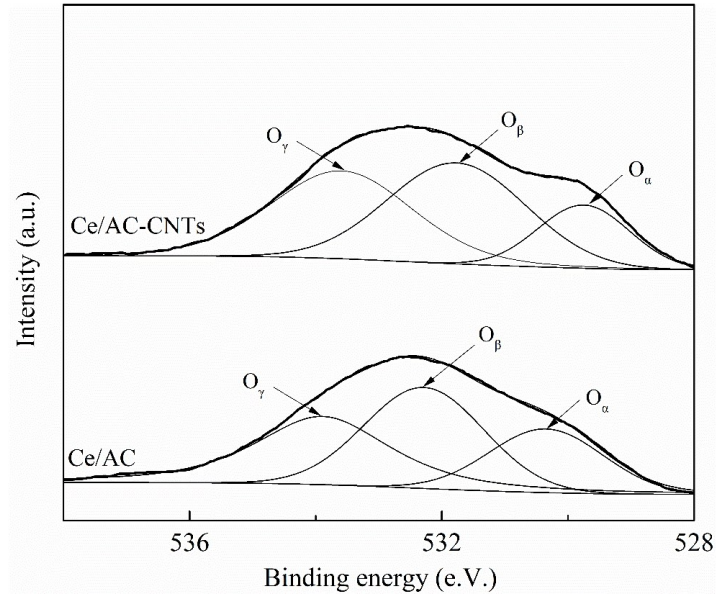

Fig. S4. XPS spectra of O 1s over the Ce/AC and Ce/AC-CNTs.

The Ce 3d spectra (Fig. S5) of Ce/AC and Ce/AC-CNTs can be separated into eight well-resolved bands, which could be classified into two groups of spin-orbital multiplets, denoted as “u” and “v”, respectively <sup>2</sup>. The u’ band are resulted from Ce<sup>3+</sup> ions, while the v’ bands are related to Ce<sup>4+</sup> ions <sup>3, 4</sup>, revealing the coexistence of Ce<sup>3+</sup> and Ce<sup>4+</sup> states in catalysts.

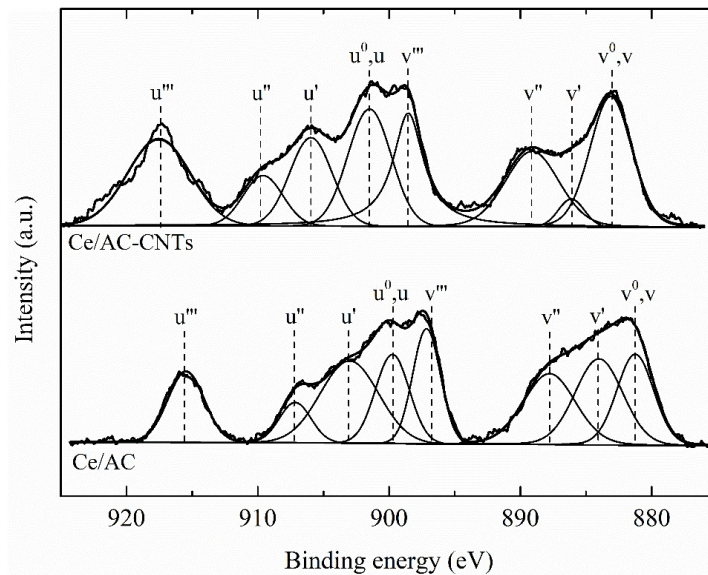

Fig. S5. XPS spectra of Ce 3d over the Ce/AC and Ce/AC-CNTs.

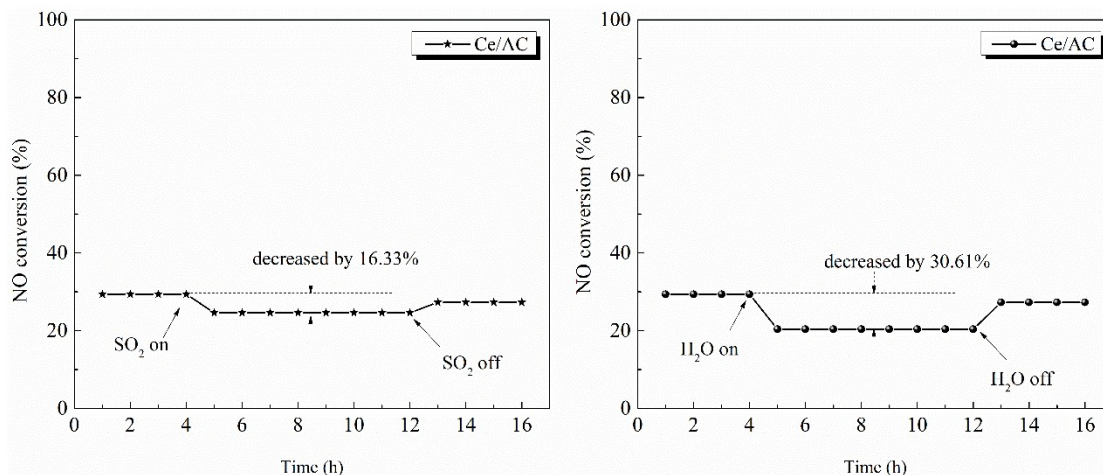

Fig. S6. SO<sub>2</sub> tolerance and water-resistance of Ce/AC over time.

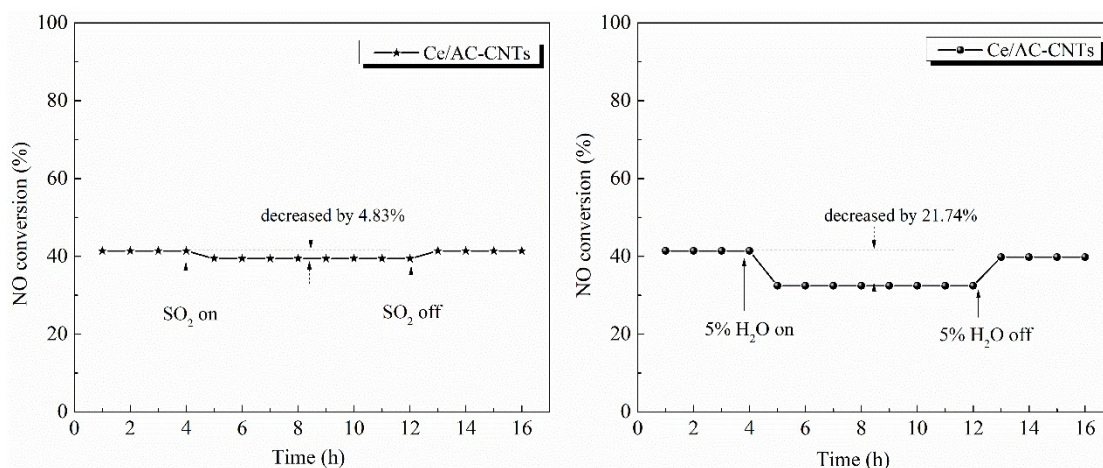

Fig. S7. SO<sub>2</sub> tolerance and water-resistance of Ce/AC-CNTs over time.

## Tables

Table S1 Concentration of Ni found in bulk (by ICP) and surface (by XPS) of catalysts.

| sample     | ICP (%) | XPS (%) |
|------------|---------|---------|
| AC-CNTs    | 9.25    | 0.81    |
| Ce/AC-CNTs | 9.28    | 0.88    |

## Reference

- 1 Y. Geng, X. Chen, S. Yang, F. Liu and W. Shan, *ACS Appl. Mater. Interfaces*, 2017, **9**, 16951-16958.
- 2 X. Yao, L. Chen, J. Cao, F. Yang, W. Tan and L. Dong, *Ind. Eng. Chem. Res.*, 2018, **57**, 12407-12419.
- 3 M. S. P. Francisco, V. R. Mastelaro, P. A. P. Nascente and A. O. Florentino, *J. Phys. Chem. B*,

2001, **105**, 10515-10522.

- 4 X. Gao, Y. Jiang, Y. Zhong, Z. Luo and K. Cen, *J. Hazard. Mater.*, 2010, **174**, 734-739.
